# Supplementary material
Source: MDPI journal article supplement (https://www.mdpi.com/2071-1050/11/19/5231)
Supplement: s1 [file s1]

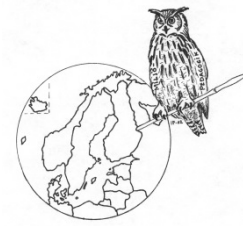

## BIODIVERSITY AND SPECIES IDENTIFICATION

*Dear Participant,*

*The aim of this Nordic-Baltic Research Project is to find out methods and ways to make teaching and learning of biodiversity and species identification both effective and understandable and at the same time also an interesting and attractive part of our life experience. The target group is student teachers from eight Nordic-Baltic countries. The test is in every respect confidential and does not affect your study results. We would very much appreciate if you could write your name and e-mail address in the questionnaire. Of course, you can also participate in the test anonymously, but then you can't participate in our lottery of 50 cinema tickets. Thank you for your time and honest answers!*

*On behalf of the Nordic-Baltic Research Group: Project leader Irmeli Palmberg, Åbo Akademi University, Vaasa, Finland ([irmeli.palmberg@abo.fi](mailto:irmeli.palmberg@abo.fi)) & Local researcher NN (e-mail)*

### **Instructions:**

**The test consists of two parts: 1) a questionnaire and 2) a PowerPoint-presentation. The Power Point-presentation of totally 18 species is running non-stop all the time while the test goes on (45 minutes).**

- **Answer the questions in part A (1-9) about your background.**
- **Identify species from the PowerPoint-presentation and write down in part B (1-18) the official names of the species in your language or their scientific names (Latin). Note: it is important to have the names at a species' level (but if you don't know the name of a species it's better to give at least a group name).**
- **Continue with part C (1-13) about your ways and experiences of identifying species and your opinion about the importance of biodiversity and species identification. Note: some questions require one answer; some require you to tick 1-3 alternatives. Read the questions carefully. Please also try to briefly explain your answers whenever asked for. In the last question (C13) you can sum up your opinion about the importance of species identification. There is also space for free comments at the end of the questionnaire.**

---

## A. Background

**[A1. Your name and e-mail-address (optional)]:**

---

---

**A2. Gender:**  woman  man

**A3. Age:**  under 25  25-35  over 35

**A4. The place where you have lived most of your life:**

- big city (over 100 000 inhabitants)  
 medium-sized city (50 000–100 000)  
 small town (under 50 000)  
 rural area

**A5. University/College, Faculty:** \_\_\_\_\_

**A6. Study program:** \_\_\_\_\_

**A7. Ongoing study year:**

- 1  2  3  4  5  other, what? \_\_\_\_\_

**A8. Have you taken a course including biology in teacher education?**  yes  no

If yes, which year was it?

- Year 1, autumn  Year 1, spring  Year 2, autumn  Year 2, spring  
 other, what? \_\_\_\_\_

**A9. What is your level of interest in nature?**

- very high  high  neither high nor low  low  very low
-

**B. The Power Point-presentation of totally 18 species [PP included several photos of each species, and only the common names in the students' own language were asked for, or their scientific names (Latin) as in this key].**

**Plants:**

1. (*Picea abies*)
2. (*Betula pendula*)
3. (*Viola tricolor*)
4. (*Ranunculus acris*)
5. (*Trifolium repens*)
6. (*Epilobium angustifolium*)
7. (*Plantago major*)
8. (*Phragmites communis*)
9. (*Tussilago farfara*)

**Animals:**

10. (*Parus major*)
  11. (*Larus ridibundus*)
  12. (*Bufo bufo*)
  13. (*Inachis io*)
  14. (*Formica rufa*)
  15. (*Vipera berus*)
  16. (*Vulpes vulpes*)
  17. (*Perca fluviatilis*)
  18. (*Esox lucius*)
-

**C1. What kind of principles do you use when identifying plant and animal species****a) in photos, and b) in nature?****Plants:**

a) In the PP-photos (# 1-9) you see plants. How do you identify them? Tick **the (1–3) most important** things you use when you identify plants **in photos**:

shape     size     colour     seeds     flowers     leaves     habitat

others: \_\_\_\_\_ (please specify)

b) Think of some plants you know in nature. How do you identify them? Tick **the (1–3) most important** things you use when you identify plants **in nature**:

shape     size     colour     seeds     flowers     leaves     habitat

sound     touch     taste     “movement”     smell

others: \_\_\_\_\_ (please specify)

**Animals:**

a) In the PP- photos (# 10-18) you see animals. How do you identify them? Tick **the (1–3) most important** things you use when you identify animals **in photos**:

shape     size     colour     habitat

others: \_\_\_\_\_ (please specify)

b) Think of some animals you know in nature. How do you identify them? Tick **the (1–3) most important** things you use when you identify animals **in nature**:

shape     size     colour     touch     smell     sound     movement

habitat     others: \_\_\_\_\_ ( please specify)

**C2. Are you interested in plants and/or animals? Tick 1 of the alternatives**

plants     animals     both plants and animals     neither plants nor animals

If you answered **plants** or **both plants and animals**, tick all the plant groups that interest you:

garden plants     wild flowers     trees and bushes     mosses

lichens     indoor flowers     algae     crops

others: \_\_\_\_\_ (please specify)

If you answered **animals** or **both plants and animals**, tick all the animal groups that interest you:

- pets                       domestic animals                       fishes                       birds  
 amphibians                       mammals                       insects and other invertebrates  
 reptiles                       others: \_\_\_\_\_ (please specify)

**C3. Why do these plants and/or animals interest you?**

\_\_\_\_\_

\_\_\_\_\_

\_\_\_\_\_

**C4. What do plants and/or animals mean to you in general?**

\_\_\_\_\_

\_\_\_\_\_

\_\_\_\_\_

**C5. Where do you get information about plant and/or animal species?**

Tick the **3 most important** sources for plant and/or animal information for you:

- family                       school                       university                       peers  
 media                       hobby  
 others: \_\_\_\_\_ (please specify)

**C5a.** If your answer included **school or university**, tick the **most important source** there:

- teachers                       learning materials                       field trips and field work  
 species identification in the classroom

Please **explain** your answer: \_\_\_\_\_

\_\_\_\_\_

\_\_\_\_\_

**C5b.** If your answer included **media**, tick the **most important source** there:

- newspapers                       nature journals                       other journal                       tv  
 internet                       social media (facebook, twitter etc.)

Please **explain** your answer: \_\_\_\_\_

\_\_\_\_\_

---

**C6. How often did you have species identification at school?**

very often    often    occasionally    not at all    can't remember

If you had species identification at school, tick at which level(s) you had it:

primary education    lower secondary education    upper secondary education

somewhere else \_\_\_\_\_ (please specify)

---

**C7. What, in your experience, are the most efficient methods in teaching, studying and learning plant and animal identification? Tick the (1–3) most efficient methods for you among the following 18 indoor and outdoor alternatives:**

**Indoors:**

- teacher-centred indoor education
- group inquiry
- traditional group work
- cooperative learning (expert and home group work)
- project work (teacher and students together)
- experiential learning method (learning through experiences)
- experimental learning method (learning through experiments)
- problem based learning method PBL (learning based on questions)
- other indoor methods (please name them) \_\_\_\_\_

**Outdoors:**

- teacher-centred outdoor education
- group inquiry
- traditional group work
- cooperative learning (expert and home group work)
- project work (teacher and students together)
- experiential learning method (learning through experiences)
- experimental learning method (learning through experiments)
- problem based learning method PBL (learning based on questions)

other outdoor methods (please name them): \_\_\_\_\_

Why? Please explain your view \_\_\_\_\_

---

---

---

---

**C8. What, in your experience, are the most efficient materials in teaching, studying and learning plant and animal identification? Tick the (1–3) most efficient teaching materials:**

- stuffed animals (birds, mammals, fishes)       dried plants       living plants  
 living animals       photos and drawings       cd/DVD       books  
 magazines       Internet  
 others \_\_\_\_\_ (please name them)

---

**C9. How important is species identification for citizens today?**

Tick **1 alternative** from the scale:

- very important     important     neither nor     less important     not important at all

Why? Please explain your view \_\_\_\_\_

---

---

---

---

---

**C10. How important is species identification for citizens in the future?**

Tick **1 alternative** from the scale:

- very important     important     neither nor     less important     not important at all

Why? Please explain your view \_\_\_\_\_

---

---

---

---

---

**C11. How important is species identification for sustainable development?**

Tick **1 alternative** from the scale:

very important     important     neither nor     less important     not important at all

Why? Please explain your view \_\_\_\_\_

\_\_\_\_\_  
\_\_\_\_\_

---

**C12. How important is biodiversity for sustainable development?**

Tick **1 alternative** from the scale:

very important     important     neither nor     less important     not important at all

Why? Please explain your view \_\_\_\_\_

\_\_\_\_\_  
\_\_\_\_\_

---

**C13. Describe your opinion about the relationship between **species identification, biodiversity** and **sustainable development** (you can also use a mind-map etc. and continue on the next page)**

**Additional comments:** \_\_\_\_\_

\_\_\_\_\_  
\_\_\_\_\_



THANK YOU!
